# Supplementary material
Source: publisher figshare collection journal article supplement (https://geolsoc.figshare.com/ndownloader/files/28110819)

Figure S1. binary plot for evaluating the effect of alteration on mobile elements (a) Zr vs. Rb; (b) Zr vs. Sr; and (c) crustal contamination (SiO2 vs. Nb/La).


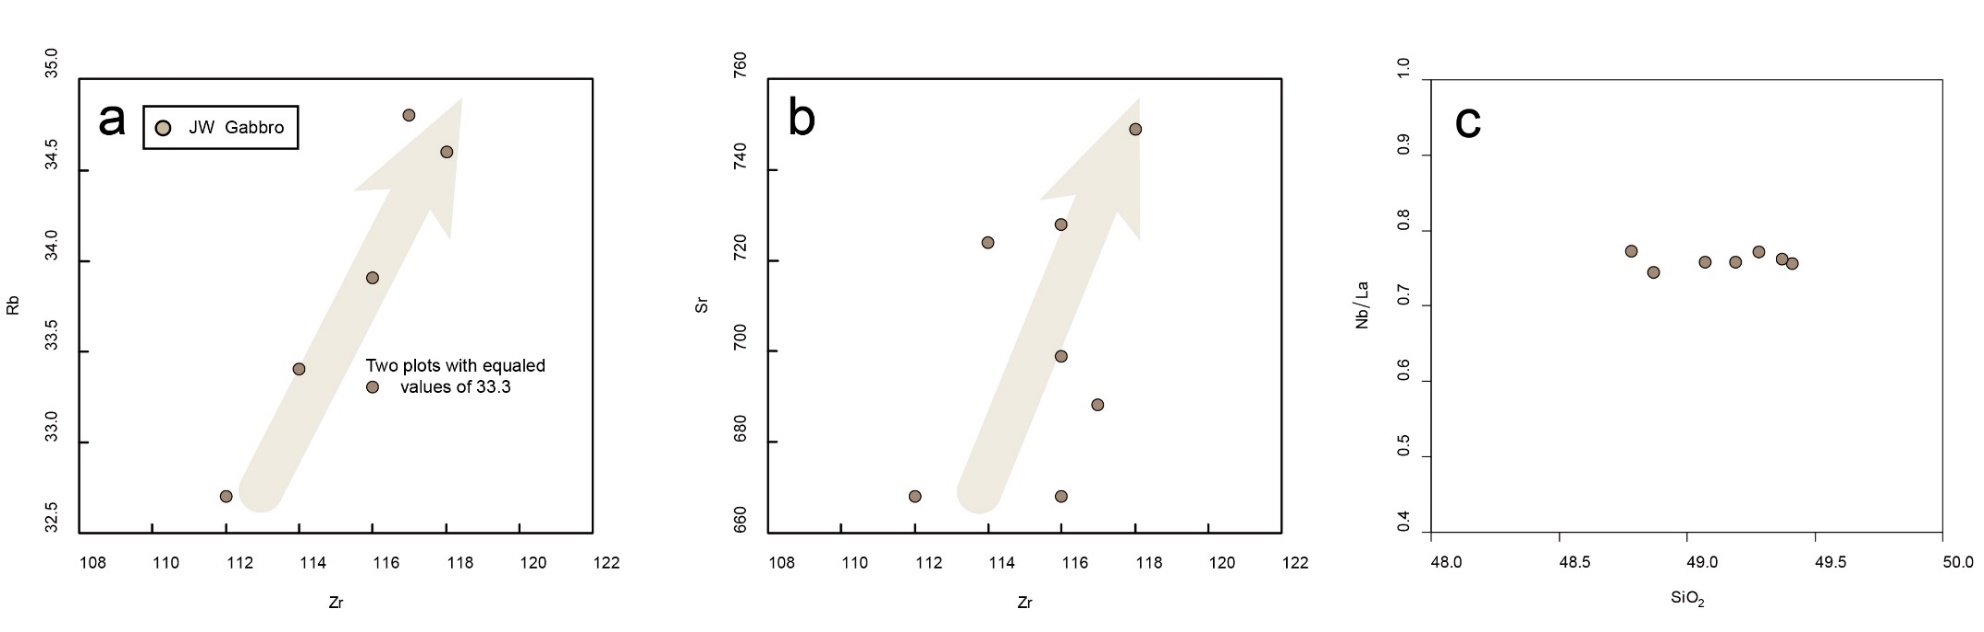

Supplement: Supplementary file 1 [file 28110819]
